# Supplementary material for: Fermi-edge superfluorescence from a quantum-degenerate electron-hole gas
Source: Springer Nature journal article supplement (doi:10.1038/srep03283), 2013-11-21
Supplement: 41598_2013_BFsrep03283_MOESM1_ESM.pdf [file 41598_2013_BFsrep03283_MOESM1_ESM.pdf]

## Supplementary Information for

# Fermi-edge superfluorescence from a quantum-degenerate electron-hole gas

Ji-Hee Kim<sup>1</sup>, G. Timothy Noe II<sup>1</sup>, Stephen A. McGill<sup>2</sup>, Yongrui Wang<sup>3</sup>, Aleksander K. Wójcik<sup>3</sup>,  
Alexey A. Belyanin<sup>3</sup> & Junichiro Kono<sup>1</sup>

<sup>1</sup>*Departments of Electrical & Computer Engineering and Physics & Astronomy, Rice University,  
Houston, TX 77005, USA*

<sup>2</sup>*National High Magnetic Field Laboratory, Florida State University, Tallahassee, FL 32310, USA*

<sup>3</sup>*Department of Physics and Astronomy, Texas A&M University, College Station, TX 77843, USA*

<sup>4</sup>*Department of Physics & Astronomy, Rice University, Houston, Texas 77005, USA*

## Theoretical Details

We used the semiconductor Bloch equations (SBEs) to study SF from a high-density electron-hole (e-h) plasma in the presence of many-body Coulomb interactions. The usual form of the SBEs<sup>1</sup> is for a bulk semiconductor or a 2D electron gas, when the states can be labeled by a 3D or 2D wave vector  $\vec{k}$ . Here we rederive SBEs following the same basic approximations but in a more general form, which accommodates the effects of a finite well width and the quantization of motion in a strong magnetic field.

We begin with a general Hamiltonian in the two-band approximation and e-h representation,

$$\begin{aligned}
\mathcal{H} = & \sum_{\alpha} \left[ (E_g^0 + E_{\alpha}^e) a_{\alpha}^{\dagger} a_{\alpha} + E_{\alpha}^h b_{\bar{\alpha}}^{\dagger} b_{\bar{\alpha}} \right] \\
& + \frac{1}{2} \sum_{\alpha\beta\gamma\delta} \left( V_{\alpha\beta\gamma\delta}^{ee} a_{\alpha}^{\dagger} a_{\beta}^{\dagger} a_{\delta} a_{\gamma} + V_{\bar{\alpha}\bar{\beta}\bar{\gamma}\bar{\delta}}^{hh} b_{\bar{\alpha}}^{\dagger} b_{\bar{\beta}}^{\dagger} b_{\bar{\delta}} b_{\bar{\gamma}} + 2V_{\alpha\bar{\beta}\gamma\bar{\delta}}^{eh} a_{\alpha}^{\dagger} b_{\bar{\beta}}^{\dagger} b_{\bar{\delta}} a_{\gamma} \right) \\
& - \mathcal{E}(t) \sum_{\alpha} \left( \mu_{\alpha} a_{\alpha}^{\dagger} b_{\bar{\alpha}}^{\dagger} + \mu_{\alpha}^* b_{\bar{\alpha}} a_{\alpha} \right), \tag{1}
\end{aligned}$$

where  $E_g^0$  is the unperturbed bandgap,  $a_{\alpha}^{\dagger}$  and  $b_{\bar{\alpha}}^{\dagger}$  are the creation operators for the electron state  $\alpha$  and hole state  $\bar{\alpha}$ , respectively,  $\mathcal{E}(t)$  is the optical field,  $\mu_{\alpha}$  is the dipole matrix element, and  $V_{\alpha\beta\gamma\delta}$  are Coulomb matrix elements, for example,  $V_{\alpha\bar{\beta}\gamma\bar{\delta}}^{eh} = \int d\vec{r}_1 \int d\vec{r}_2 \Psi_{\alpha}^{e*}(\vec{r}_1) \Psi_{\bar{\beta}}^{e*}(\vec{r}_2) \frac{e^2}{\epsilon|\vec{r}_1 - \vec{r}_2|} \Psi_{\gamma}^e(\vec{r}_1) \Psi_{\bar{\delta}}^e(\vec{r}_2)$ . Here we denote the hole state which can be recombined with a given electron state  $\alpha$  optically by  $\bar{\alpha}$ , and assume that there is a one-to-one correspondence between them. For the interband Coulomb interaction,  $V_{\alpha\bar{\beta}\gamma\bar{\delta}}^{eh} a_{\alpha}^{\dagger} b_{\bar{\beta}}^{\dagger} b_{\bar{\delta}} a_{\gamma}$  is the only non-zero matrix element due to the orthogonality between the Bloch functions of the conduction and valence bands<sup>2</sup>. The electron and hole wave functions can be written as  $\Psi_{\alpha}^e(\vec{r}) = \psi_{\alpha}^e(\vec{r}) u_{c0}(\vec{r})$  and  $\Psi_{\bar{\alpha}}^h(\vec{r}) = \psi_{\bar{\alpha}}^h(\vec{r}) u_{v0}^*(\vec{r})$ , respectively. In the problems we study, the conduction band and valence band states connected by an optical transition always have

the same envelope wave function, so we take  $\psi_{\alpha}^h(\vec{r}) = \psi_{\alpha}^{e*}(\vec{r})$ . Then the Coulomb matrix elements are related with each other through  $V_{\bar{\alpha}\bar{\beta}\bar{\gamma}\bar{\delta}}^{hh} = V_{\gamma\delta\alpha\beta}^{ee}$  and  $V_{\alpha\beta\gamma\delta}^{eh} = -V_{\alpha\delta\gamma\beta}^{ee}$ , and we can drop the superscript by defining  $V_{\alpha\beta\gamma\delta} \equiv V_{\alpha\beta\gamma\delta}^{ee}$ .

Using the above Hamiltonian, we can obtain the equations of motion for the distribution functions  $n_{\alpha}^e = \langle a_{\alpha}^{\dagger} a_{\alpha} \rangle$  and  $n_{\alpha}^h = \langle b_{\alpha}^{\dagger} b_{\alpha} \rangle$ , and the polarization  $P_{\alpha} = \langle b_{\alpha} a_{\alpha} \rangle$ . Using the Hartree-Fock approximation (HFA) and the random phase approximation (RPA), we arrive at the SBEs:

$$i\hbar \frac{d}{dt} P_{\alpha} = \left( E_g^0 + E_{\alpha}^{eR} + E_{\alpha}^{hR} \right) P_{\alpha} + \left( n_{\alpha}^e + n_{\alpha}^h - 1 \right) \left[ \mu_{\alpha} \mathcal{E}(t) + \sum_{\beta} V_{\alpha\beta\beta\alpha} P_{\beta} \right] + i\hbar \frac{d}{dt} P_{\alpha} \Big|_{\text{scatt}} \quad (2)$$

$$\hbar \frac{d}{dt} n_{\alpha}^e = -2 \text{Im} \left[ \left( \mu_{\alpha} \mathcal{E}(t) + \sum_{\beta} V_{\alpha\beta\beta\alpha} P_{\beta} \right) P_{\alpha}^* \right] + \hbar \frac{d}{dt} n_{\alpha}^e \Big|_{\text{scatt}}, \quad (3)$$

$$\hbar \frac{d}{dt} n_{\alpha}^h = -2 \text{Im} \left[ \left( \mu_{\alpha} \mathcal{E}(t) + \sum_{\beta} V_{\alpha\beta\beta\alpha} P_{\beta} \right) P_{\alpha}^* \right] + \hbar \frac{d}{dt} n_{\alpha}^h \Big|_{\text{scatt}}, \quad (4)$$

where  $E_{\alpha}^{eR} = \left( E_{\alpha}^e - \sum_{\beta} V_{\alpha\beta\beta\alpha} n_{\beta}^e \right)$  and  $E_{\alpha}^{hR} = \left( E_{\alpha}^h - \sum_{\beta} V_{\alpha\beta\beta\alpha} n_{\beta}^h \right)$  are the renormalized energies, and the scattering terms account for higher-order contributions beyond the HFA and other scattering processes such as scattering with LO-phonons.

These equations, together with Maxwell's equations for the electromagnetic field, can be applied to study the full nonlinear dynamics of interaction between the e-h plasma and radiation. Here we derive the gain for given carrier distributions  $n_{\alpha}^e$  and  $n_{\alpha}^h$ , which was used to plot Fig. 5. Assuming a monochromatic and sinusoidal time dependence for the field  $\mathcal{E}(t) = \mathcal{E}_0 e^{-i\omega t}$  and the polarization  $P_{\alpha}(t) = P_{0\alpha} e^{-i\omega t}$ , we can find  $P_{\alpha}$  from Eq. (2) and define the quantity  $\chi_{\alpha}(\omega) = P_{0\alpha} / \mathcal{E}_0$ , which satisfies the equation below:

$$\chi_{\alpha}(\omega) = \chi_{\alpha}^0(\omega) \left[ 1 + \frac{1}{\mu_{\alpha}} \sum_{\beta} V_{\alpha\beta\beta\alpha} \chi_{\beta}(\omega) \right], \quad (5)$$

where

$$\chi_{\alpha}^0(\omega) = \frac{\mu_{\alpha} (n_{\alpha}^e + n_{\alpha}^h - 1)}{\hbar\omega - (E_g^0 + E_{\alpha}^{eR} + E_{\alpha}^{hR}) + i\hbar\gamma_{\alpha}} . \quad (6)$$

Here we have written the dephasing term phenomenologically as  $dP_{\alpha}/dt|_{\text{scatt}} = -\gamma_{\alpha}P_{\alpha}$ . The optical susceptibility is then

$$\chi(\omega) = \frac{1}{V} \sum_{\alpha} \mu_{\alpha}^* \chi_{\alpha}(\omega) , \quad (7)$$

where  $V$  is the normalization volume. The gain spectrum is given by<sup>1</sup>

$$g(\omega) = \frac{4\pi\omega}{n_b c} \text{Im}[\chi(\omega)] , \quad (8)$$

where  $n_b$  is the background refractive index, and  $c$  is the speed of light. We use the above general results to analyze optical properties under different conditions.

In a quantum well of thickness  $L_w$ , the envelope functions for electrons and holes are  $\psi_{n,\vec{k}}^{e,h}(\vec{r}) = \varphi_n(z) \exp(i\vec{k} \cdot \vec{\rho}) / \sqrt{A}$ , where  $\vec{\rho} = (x, y)$ ,  $\varphi_n(z)$  is the envelope wave function in the growth direction for the  $n$ -th subband, and  $A$  is the normalization area. To calculate the Coulomb matrix element  $V_{\alpha\beta\beta\alpha}$ , we define  $\tilde{V}_{\alpha\beta} \equiv V_{\alpha\beta\beta\alpha}$  and put  $\alpha = \{n, \vec{k}, s\}$ ,  $\beta = \{n', \vec{k}', s'\}$ , where  $s$  denotes the spin quantum index. Then one gets

$$\tilde{V}_{n,\vec{k},s;n',\vec{k}',s'} = V^{2D}(q) F_{nn'n'n}(q) \delta_{ss'} , \quad (9)$$

where  $q = |\vec{q}| = |\vec{k} - \vec{k}'|$ ,  $V^{2D}(q) = 2\pi e^2 / \epsilon A q$ ,  $\epsilon$  is the dielectric function, and the form factor  $F_{nn'n'n}(q)$  is defined as

$$F_{n1,n2,n3,n4}(q) = \int dz_1 \int dz_2 \varphi_{n1}^*(z_1) \varphi_{n2}^*(z_2) \exp(-q|z_1 - z_2|) \varphi_{n3}(z_1) \varphi_{n4}(z_2) . \quad (10)$$

Throughout the paper, we will assume that only the lowest subband for electrons and holes is occupied. In this case, we can define  $\tilde{V}(q) = V^{2D}(q)F_{1111}(q)$ . The dielectric function  $\epsilon(\vec{q}, \omega)$ , which describes the screening of the Coulomb potential, is given by the Lindhard formula for a pure 2D case<sup>1</sup>; it can be generalized to the quasi-2D case as

$$\epsilon(\vec{q}, \omega) = 1 + \tilde{V}(q) (\Pi_e(\vec{q}, \omega) + \Pi_h(\vec{q}, \omega)) , \quad (11)$$

where  $\Pi_{e(h)}(\vec{q}, \omega)$  is the polarization function of an electron or hole, which is given by

$$\Pi(\vec{q}, \omega) = 2 \sum_{\vec{k}} \frac{n_{\vec{k}+\vec{q}} - n_{\vec{k}}}{\omega + i0^+ - E_{\vec{k}+\vec{q}} + E_{\vec{k}}} . \quad (12)$$

Here, we dropped the subscripts  $e$  or  $h$ ,  $n_{\vec{k}}$  is the distribution function, the factor of 2 accounts for the summation over spin, and the spin index is suppressed. For simplicity, we will choose the static limit, namely,  $\omega = 0$ .

Given the dielectric function  $\epsilon(q, 0)$ , the screened Coulomb matrix element is  $\tilde{V}_s(q) = \tilde{V}(q)/\epsilon(q, 0)$ .

For simplicity, we will still write it as  $\tilde{V}(q)$ . Applying Eq. (5) to the case above, we get the equation for  $\chi_{\vec{k}}(\omega)$ :

$$\chi_{\vec{k}}(\omega) = \chi_{\vec{k}}^0(\omega) \left[ 1 + \frac{1}{\mu_{\vec{k}}} \sum_{\vec{k}'} \tilde{V}(|\vec{k} - \vec{k}'|) \chi_{\vec{k}'}(\omega) \right] , \quad (13)$$

where  $\chi_{\vec{k}}^0(\omega)$  becomes

$$\chi_{\vec{k}}^0(\omega) = \frac{\mu_{\vec{k}} (n_{\vec{k}}^e + n_{\vec{k}}^h - 1)}{\hbar\omega - (E_g^0 + E_{\vec{k}}^{eR} + E_{\vec{k}}^{hR}) + i\hbar\gamma_{\vec{k}}} . \quad (14)$$

To solve Eq. (13), we notice that  $\chi_{\vec{k}}^0(\omega)$  does not depend on the direction of  $\vec{k}$ , so  $\chi_{\vec{k}}(\omega)$  will not depend on it, either. Then, after converting the summation in Eq. (13) into the integral, the

integration over the azimuthal angle is acting on  $\tilde{V}(|\vec{k} - \vec{k}'|)$  only. If we define

$$\tilde{V}(k, k') = \frac{1}{2\pi} \int_0^{2\pi} d\phi \tilde{V}\left(\sqrt{k^2 + k'^2 - 2kk' \cos \phi}\right), \quad (15)$$

then Eq. (13) can be written as

$$\chi_k(\omega) = \chi_k^0(\omega) \left[ 1 + \frac{A}{2\pi\mu_k} \int_0^\infty k' dk' \tilde{V}(k, k') \chi_{k'}(\omega) \right]. \quad (16)$$

After discretizing the integral, we have a system of linear equations for  $\chi_k(\omega)$ , which can be solved by using LAPACK<sup>3</sup>. The band structure for our sample consisting of undoped 8-nm In<sub>0.2</sub>Ga<sub>0.8</sub>As wells and 15-nm GaAs barriers on a GaAs substrate is calculated using the parameters given by Vurgaftman *et al.*<sup>4</sup>. The strain effect is included using the results of Sugawara *et al.*<sup>5</sup>. Examples of calculated gain spectra are shown in Figs. 5a and 5b.

For a quantum well structure in a strong perpendicular magnetic field, the electronic states are fully quantized. Considering only the lowest subband in the quantum well, the equation for the susceptibility is written as

$$\chi_{\nu,s} = \chi_{\nu,s}^0 \left[ 1 + \frac{1}{\mu_{\nu,s}} \sum_{\nu'} V_{\nu,\nu'} \chi_{\nu',s} \right], \quad (17)$$

where  $\nu$  is the Landau level index,  $s$  is the spin index, and  $V_{\nu,\nu'}$  is the Coulomb matrix element given by

$$V_{\nu,\nu'} = \frac{e^2}{2\pi\epsilon} \int_0^{2\pi} d\theta \int_0^\infty dq \left| \int dx e^{iqx \cos \theta} \phi_\nu(x) \phi_{\nu'}^*(x + qa_H^2 \sin \theta) \right|^2, \quad (18)$$

where  $\phi_\nu(x)$  is the  $x$ -dependent part of the wavefunction of the  $\nu$ -th Landau level and  $a_H^2 = \hbar c/eB$ .

The renormalized electronic energies in the expression for  $\chi_{\nu,s}^0$  are

$$E_{\nu,s}^{eR} = E_{\nu,s}^e - \sum_{\nu'} V_{\nu,\nu'} n_{\nu'}^e, \quad (19)$$

and a similar equation holds for holes. The gain is calculated as

$$g(\omega) = \frac{4\pi\omega}{n_b c} \frac{1}{\pi a_H^2} \text{Im} \left[ \sum_{\nu} \mu_{\nu,s}^* \chi_{\nu,s} \right]. \quad (20)$$

An example of the calculated gain for  $B = 17$  T is shown in Figs. 5c and 5d.

1. Haug, H. & Koch, S. W. *Quantum Theory of the Optical and Electronic Properties of Semiconductors* (World Scientific, Singapore, 2004), fourth edn.
2. Vas'ko, F. T. & Kuznetsov, A. V. *Electronic States and Optical Transitions in Semiconductor Heterostructures*. Graduate Texts in Contemporary Physics (Springer, Berlin, 1999).
3. Anderson, E. *et al.* *LAPACK Users' Guide* (Society for Industrial and Applied Mathematics, Philadelphia, PA, 1999), third edn.
4. Vurgaftman, I., Meyer, J. R. & Ram-Mohan, L. R. Band parameters for III-V compound semiconductors and their alloys. *J. Appl. Phys.* **89**, 5815 (2001).
5. Sugawara, M., Okazaki, N., Fujii, T. & Yamazaki, S. Conduction-band and valence-band structures in strained  $\text{In}_{1-x}\text{Ga}_x\text{As}/\text{InP}$  quantum wells on (001) InP substrates. *Phys. Rev. B* **48**, 8102–8118 (1993).
